# Supplementary material for: Investigation of the Interaction between Aloe vera Anthraquinone Metabolites and c-Myc and C-Kit G-Quadruplex DNA Structures
Source: MDPI journal article supplement (doi:10.3390/ijms232416018), 2022-12-16
Supplement: s1 [file s1]

# Investigation of the Interaction between *Aloe vera* Anthraquinone Metabolites and *c-Myc* and *C-Kit* G-Quadruplex DNA Structures

Sabrina Dallavalle, Roberto Artali, Salvatore Princiotta, Loana Musso, Gigliola Borgonovo and Stefania Mazzini

**Table S1.** Selected  $^1\text{H}$  chemical shift values of G-quartets for the complex of aloe emodin with c-kit21T12T21. S1

**Table S2.** Selected  $^1\text{H}$  chemical shift values for the complex of aloe emodin-8-glucoside with c-kit21T12T21. S2

**Table S3.** Selected  $^1\text{H}$  NMR chemical shift values for the complex of aloe emodin with Pu22T14T23 G-quadruplex. S3

**Table S4.** Selected  $^1\text{H}$  NMR chemical shift values for the complex of aloe emodin-8-glucoside with Pu22T14T23 G-quadruplex. S4

**Table S5.**  $^1\text{H}$  NMR chemical shift values of G quartets for the complex of aloin with Pu22T14T23 G-quadruplex. S5

**Figure S1.**  $^1\text{H}$  NMR spectrum of aloin at 25 °C in 90%  $\text{H}_2\text{O}$  and 10%  $\text{D}_2\text{O}$ , 20 mM KCl, and 5 mM K-phosphate buffer, pH 6.9. S6

**Figure S2.** Selected region of  $^1\text{H}$  NMR spectrum of aloe-emodin 8-glucoside at 25 °C in 90%  $\text{H}_2\text{O}$  and 10%  $\text{D}_2\text{O}$ , 20 mM KCl, and 5 mM K-phosphate buffer, pH 6.9. S6

**Table S1.** Selected  $^1\text{H}$  chemical shift values of G quartets for the complex of aloe emodin with c-kit21T12T21.<sup>a</sup>

| c-kit21T12T21 | H1/H2/H5/CH <sub>3</sub> | $\Delta\delta^b$ | H6/H8 | $\Delta\delta^b$ |
|---------------|--------------------------|------------------|-------|------------------|
| C1            | 5.66                     | +0.02            | 7.48  | −0.08            |
| G2            | 11.89                    | −0.09            | 8.21  | 0.00             |
| G3            | 11.21                    | −0.09            | 7.78  | +0.03            |
| G4            | 10.86                    | <b>−0.29</b>     | 7.76  | +0.07            |
| C5            | 6.17                     | −0.01            | 8.02  | −0.03            |
| G6            | 11.50                    | −0.02            | 8.05  | +0.02            |
| G7            | 11.50                    | −0.08            | 8.00  | −0.02            |
| G8            | 10.95                    | <b>−0.36</b>     | n.d.  | −0.05            |
| C9            | 6.10                     | −0.04            | 7.59  | −0.13            |
| G10           | n.d.                     | -                | n.d.  | -                |
| C11           | 6.05                     | 0.00             | 7.88  | −0.08            |
| T12           | 1.89                     | +0.01            | 7.56  | −0.14            |
| A13           | n.d.                     | -                | 8.18  | +0.01            |
| G14           | 11.92                    | −0.02            | 8.21  | −0.04            |
| G15           | 11.29                    | −0.09            | 7.82  | 0.00             |
| G16           | 10.86                    | <b>−0.18</b>     | 7.79  | +0.03            |
| A17           | n.d.                     | -                | 8.54  | +0.03            |
| G18           | 11.74                    | −0.08            | 8.15  | +0.07            |
| G19           | 11.50                    | −0.06            | 7.99  | −0.01            |
| G20           | 10.97                    | <b>−0.28</b>     | 7.76  | +0.09            |
| T21           | n.d.                     | -                | n.d.  | -                |

<sup>a</sup> Measured at 25 °C in ppm ( $\delta$ ) from external DSS. Solvent H<sub>2</sub>O-D<sub>2</sub>O (90:10 v/v), 5 mM phosphate buffer, 20 mM KCl, pH 6.9, R = 1.0. <sup>b</sup> $\Delta\delta = \delta_{\text{bound}} - \delta_{\text{free}}$

**Table S2.** Selected  $^1\text{H}$  chemical shift values for the complex of aloe emodin-8-glucoside with c-kit21T12T21.<sup>a</sup>

|       | R = [ligand]/[ckit21T12t21] = 1.0 |                  |       |                  | R = [ligand]/[ckit21T12t21] = 2.0 |                  |       |                  |
|-------|-----------------------------------|------------------|-------|------------------|-----------------------------------|------------------|-------|------------------|
| c-kit | H1/H2/H5/CH <sub>3</sub>          | $\Delta\delta^b$ | H6/H8 | $\Delta\delta^b$ | H1/H2/H5/CH <sub>3</sub>          | $\Delta\delta^b$ | H6/H8 | $\Delta\delta^b$ |
| C1    | 5.64                              | 0.00             | 7.50  | −0.06            | 5.66                              | +0.02            | 7.47  | −0.09            |
| G2    | 11.76                             | <b>−0.20</b>     | 8.14  | −0.03            | 11.91                             | <b>−0.10</b>     | 8.16  | +0.01            |
| G3    | 11.14                             | −0.16            | 7.75  | 0.00             | 11.25                             | −0.05            | 7.77  | +0.02            |
| G4    | 10.71                             | <b>−0.44</b>     | 7.80  | +0.11            | 10.71                             | <b>−0.44</b>     | 7.80  | +0.11            |
| C5    | 6.18                              | 0.00             | 8.02  | −0.02            | 6.19                              | +0.01            | 8.02  | −0.02            |
| G6    | 11.45                             | −0.07            | n.d.  | -                | 11.53                             | +0.01            | 8.04  | +0.02            |
| G7    | 11.45                             | −0.13            | 7.94  | −0.04            | 11.53                             | −0.05            | 8.00  | +0.02            |
| G8    | 10.95                             | <b>−0.36</b>     | 7.93  | +0.15            | 10.95                             | <b>−0.36</b>     | 7.93  | +0.15            |
| C9    | 6.18                              | −0.05            | 7.82  | <b>+0.10</b>     | 6.05                              | −0.08            | 7.88  | <b>+0.16</b>     |
| G10   | n.d.                              | -                | n.d.  |                  | n.d.                              | -                | n.d.  | -                |
| C11   | 6.07                              | +0.02            | 7.93  | −0.03            | 6.09                              | +0.04            | 7.95  | −0.01            |
| T12   | 1.89                              | −0.08            | 7.57  | −0.13            | 1.80                              | −0.08            | 7.57  | −0.13            |
| A13   | n.d.                              | -                | 8.31  | <b>+0.15</b>     | n.d.                              | -                | 8.31  | <b>+0.15</b>     |
| G14   | 11.82                             | −0.12            | 8.21  | −0.10            | 11.95                             | −0.04            | 8.23  | −0.02            |
| G15   | 11.22                             | −0.16            | 7.82  | 0.00             | 11.33                             | −0.05            | 7.87  | +0.05            |
| G16   | 10.71                             | <b>−0.33</b>     | 7.77  | +0.01            | 10.71                             | <b>−0.33</b>     | 7.77  | +0.01            |
| A17   | n.d.                              | -                | 8.55  | +0.04            | n.d.                              | -                | 8.56  | +0.05            |
| G18   | 11.67                             | <b>−0.15</b>     | n.d.  | -                | 11.77                             | −0.05            | 8.02  | −0.06            |
| G19   | 11.45                             | −0.11            | 7.96  | −0.04            | 11.53                             | −0.03            | 8.03  | +0.03            |
| G20   | 10.93                             | <b>−0.32</b>     | 7.78  | +0.11            | 10.93                             | <b>−0.32</b>     | 7.75  | +0.08            |
| T21   | 1.83                              | <b>+0.33</b>     | 7.51  | <b>+0.36</b>     | 1.83                              | <b>+0.33</b>     | 7.51  | <b>+0.36</b>     |

<sup>a</sup> Measured at 25 °C in ppm ( $\delta$ ) from external DSS. Solvent H<sub>2</sub>O-D<sub>2</sub>O (90:10 v/v), 5 mM phosphate buffer, 20 mM KCl, pH 6.9. <sup>b</sup>  $\Delta\delta = \delta_{\text{bound}} - \delta_{\text{free}}$

**Table S3.** Selected  $^1\text{H}$  NMR chemical shift values for the complex of aloe emodin with Pu22T14T23 G-quadruplex<sup>a,b</sup>.

|     | H1/H2/Me | $\Delta\delta^c$ | H6/H8 | $\Delta\delta^c$ |
|-----|----------|------------------|-------|------------------|
| T4  | 1.57     | −0.08            | 7.22  | −0.02            |
| G5  | -        | -                | -     | -                |
| A6  | -        | -                | -     | -                |
| G7  | 11.68    | <b>−0.10</b>     | 8.03  | +0.01            |
| G8  | 11.18    | −0.04            | 7.72  | 0.00             |
| G9  | 10.60    | 0.00             | 7.78  | +0.03            |
| T10 | 2.04     | +0.05            | -     | -                |
| G11 | 11.60    | <b>−0.11</b>     | 7.98  | −0.01            |
| G12 | 11.43    | −0.07            | 7.88  | −0.02            |
| G13 | 10.95    | <b>−0.11</b>     | 7.87  | +0.01            |
| T14 | 1.92     | 0.00             | 7.66  | +0.01            |
| A15 | 8.38     | 0.00             | 8.54  | +0.01            |
| G16 | 11.80    | <b>−0.10</b>     | 8.09  | −0.02            |
| G17 | 11.19    | −0.06            | 7.78  | −0.02            |
| G18 | 10.92    | <b>−0.10</b>     | 7.72  | −0.07            |
| T19 | 2.04     | +0.05            | 7.90  | +0.04            |
| G20 | 11.26    | −0.02            | -     | -                |
| G21 | 11.32    | −0.05            | 7.88  | −0.03            |
| G22 | 10.92    | <b>−0.12</b>     | 7.78  | +0.17            |
| T23 | 1.62     | +0.14            | 7.27  | +0.13            |
| A24 | -        | -                | -     | -                |
| A25 | 7.47     | +0.08            | 7.57  | +0.07            |

<sup>a</sup>Measured at 25 °C in H<sub>2</sub>O/D<sub>2</sub>O (9:1), 70 mM KCl, 25 mM potassium phosphate buffer (pH 6.9) and R = 1.0. <sup>b</sup>Measured in ppm from external DSS.

<sup>c</sup> $\Delta\delta = \delta_{\text{bound}} - \delta_{\text{free}}$ .

**Table S4.** Selected  $^1\text{H}$  NMR chemical shift values for the complex of aloe emodin-8-glucoside with Pu22T14T23 G-quadruplex<sup>a,b</sup>.

|     | H1/H2/Me | $\Delta\delta^c$ | H6/H8 | $\Delta\delta^c$ |
|-----|----------|------------------|-------|------------------|
| T4  | 1.62     | −0.04            | 7.15  | −0.06            |
| G5  | -        | -                | -     | -                |
| A6  | -        | -                | -     | -                |
| G7  | 11.46    | <b>−0.28</b>     | 8.03  | +0.01            |
| G8  | 11.01    | −0.21            | 7.72  | 0.00             |
| G9  | 10.41    | <b>−0.19</b>     | 7.78  | +0.03            |
| T10 | 2.01     | +0.01            | 7.90  | +0.04            |
| G11 | 11.32    | <b>−0.38</b>     | 7.90  | −0.09            |
| G12 | 11.27    | −0.22            | 7.77  | −0.02            |
| G13 | 10.82    | <b>−0.23</b>     | 7.79  | +0.01            |
| T14 | 1.92     | 0.00             | 7.66  | +0.01            |
| A15 | 8.37     | 0.00             | 8.52  | +0.02            |
| G16 | 11.53    | <b>−0.37</b>     | 8.00  | −0.02            |
| G17 | 11.08    | −0.16            | 7.70  | −0.06            |
| G18 | 10.67    | <b>−0.34</b>     | 7.72  | −0.07            |
| T19 | 2.01     | +0.01            | 7.90  | +0.04            |
| G20 | 11.27    | −0.01            | 7.88  | -                |
| G21 | 11.27    | −0.08            | 7.89  | +0.07            |
| G22 | 10.73    | <b>−0.30</b>     | 7.68  | +0.17            |
| T23 | 1.42     | −0.06            | 7.27  | +0.13            |
| A24 | -        | -                | -     | -                |
| A25 |          |                  | 7.50  | 0.00             |

<sup>a</sup>Measured at 25 °C in H<sub>2</sub>O/D<sub>2</sub>O (9:1), 70 mM KCl, 25 mM potassium phosphate buffer (pH 6.9) and R = 1.0. <sup>b</sup>Measured in ppm from external DSS.

<sup>c</sup> $\Delta\delta = \delta_{\text{bound}} - \delta_{\text{free}}$ .

**Table S5.**  $^1\text{H}$  NMR chemical shift values of G quartets for the complex of aloin with Pu22T14T23 G-quadruplex<sup>a,b</sup>.

|     | H1/H2/Me | $\Delta\delta^c$ |
|-----|----------|------------------|
| G7  | 11.69    | −0.07            |
| G8  | 11.20    | −0.02            |
| G9  | 10.62    | +0.02            |
| G11 | 11.60    | −0.11            |
| G12 | 11.42    | −0.08            |
| G13 | 10.95    | −0.11            |
| G16 | 11.80    | −0.10            |
| G17 | 11.20    | −0.05            |
| G18 | 10.96    | −0.16            |
| G20 | 11.18    | 0.00             |
| G21 | 11.35    | −0.02            |
| G22 | 10.95    | −0.09            |

<sup>a</sup>Measured at 25 °C in  $\text{H}_2\text{O}/\text{D}_2\text{O}$  (9:1), 70 mM KCl, 25 mM potassium phosphate buffer (pH 6.9) and  $R = 4.0$ . <sup>b</sup>Measured in ppm from external DSS.

<sup>c</sup> $\Delta\delta = \delta_{\text{bound}} - \delta_{\text{free}}$ .

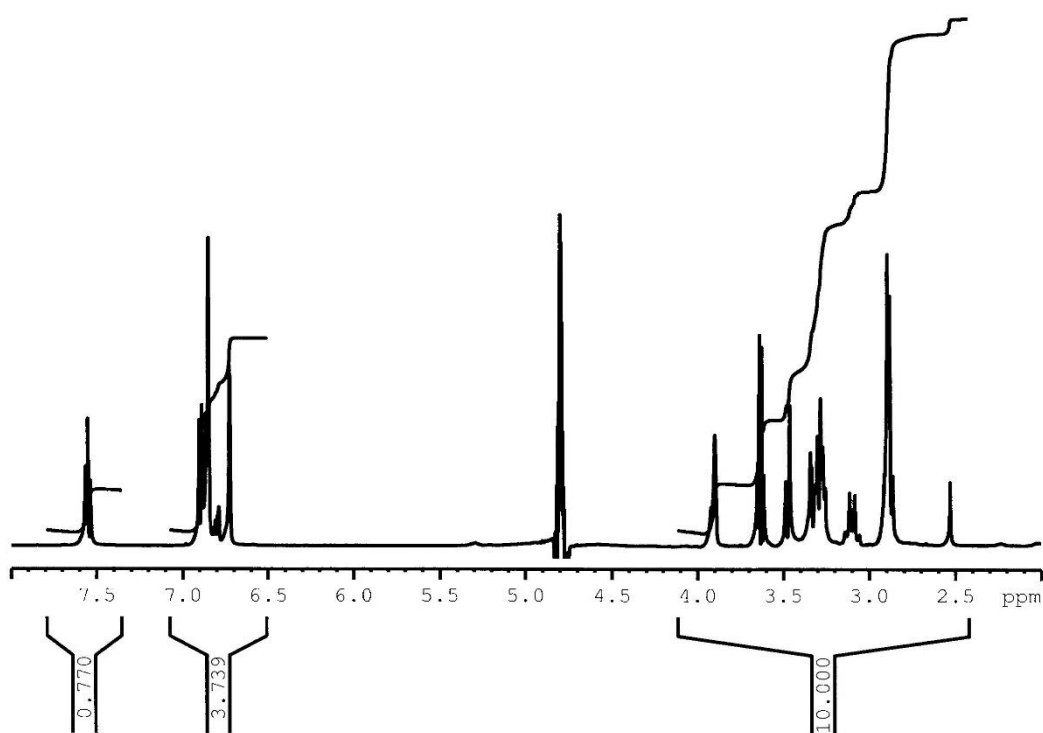

**Figure S1.**  $^1\text{H}$  NMR spectrum of aloin at 25 °C in 90%  $\text{H}_2\text{O}$  and 10%  $\text{D}_2\text{O}$ , 20 mM KCl, and 5 mM K-phosphate buffer, pH 6.9.

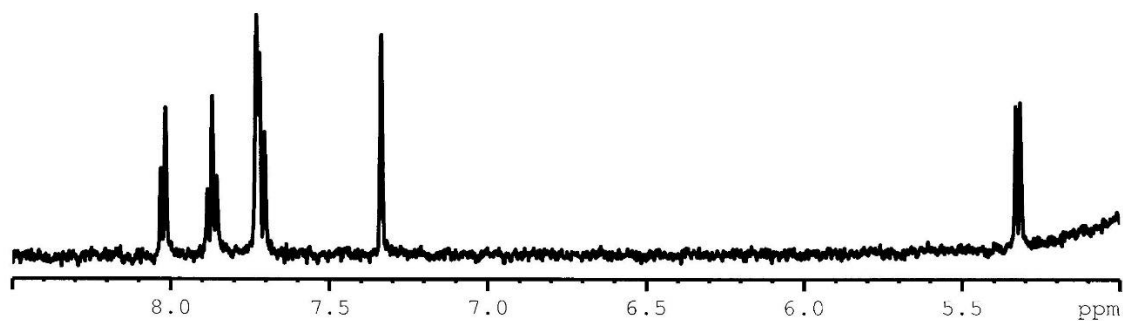

**Figure S2.** Selected region of  $^1\text{H}$  NMR spectrum of aloe-emodin 8-glucoside at 25 °C in 90%  $\text{H}_2\text{O}$  and 10%  $\text{D}_2\text{O}$ , 20 mM KCl, and 5 mM K-phosphate buffer, pH 6.9.
